# Supplementary material
Source: Springer Nature journal article supplement (https://www.springermedizin.de/resource/supplementary/12913_2013_2869_MOESM1_ESM.pdf/9531720)

Percentage visiting once every two years

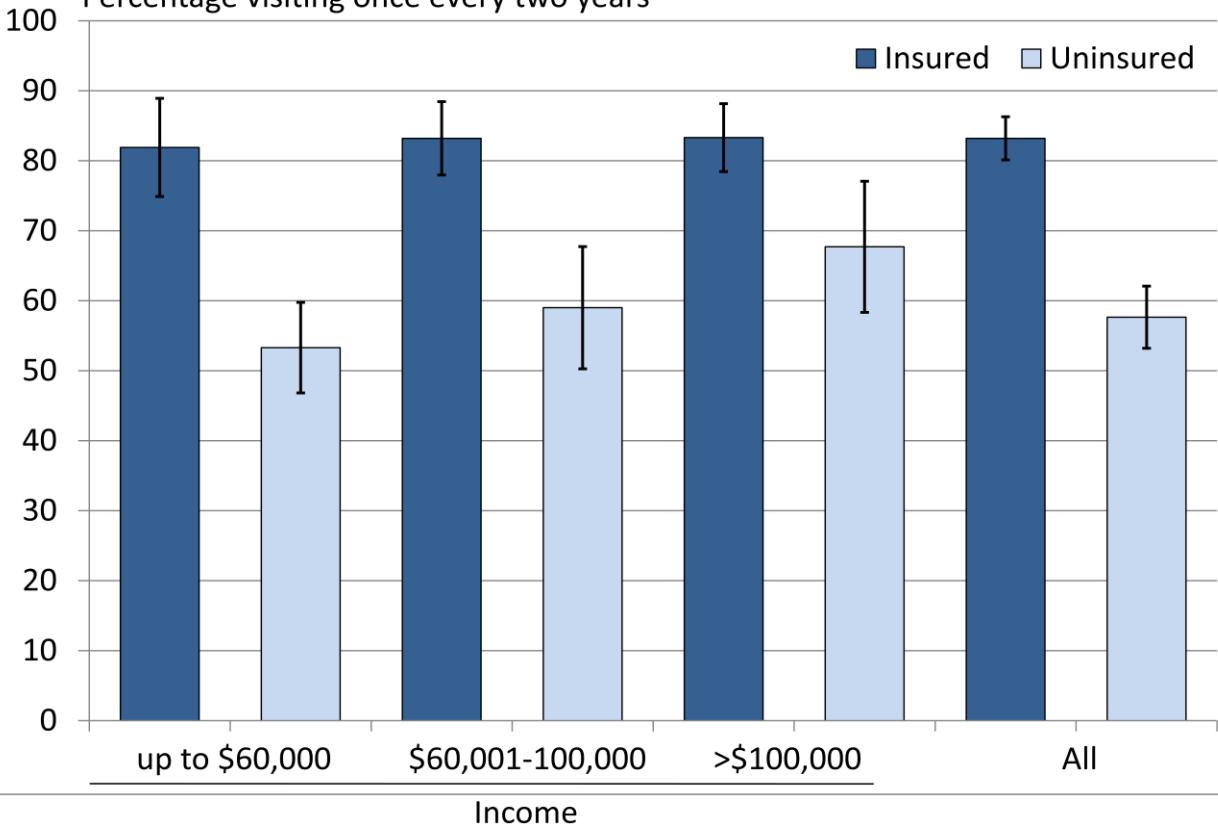

Supplement: MOESM1 [file 9531720]
